# Supplementary material
Source: Frontiers journal article supplement (https://www.frontiersin.org/articles/154922)
Supplement: Image_2.PDF [file Image_2.PDF]

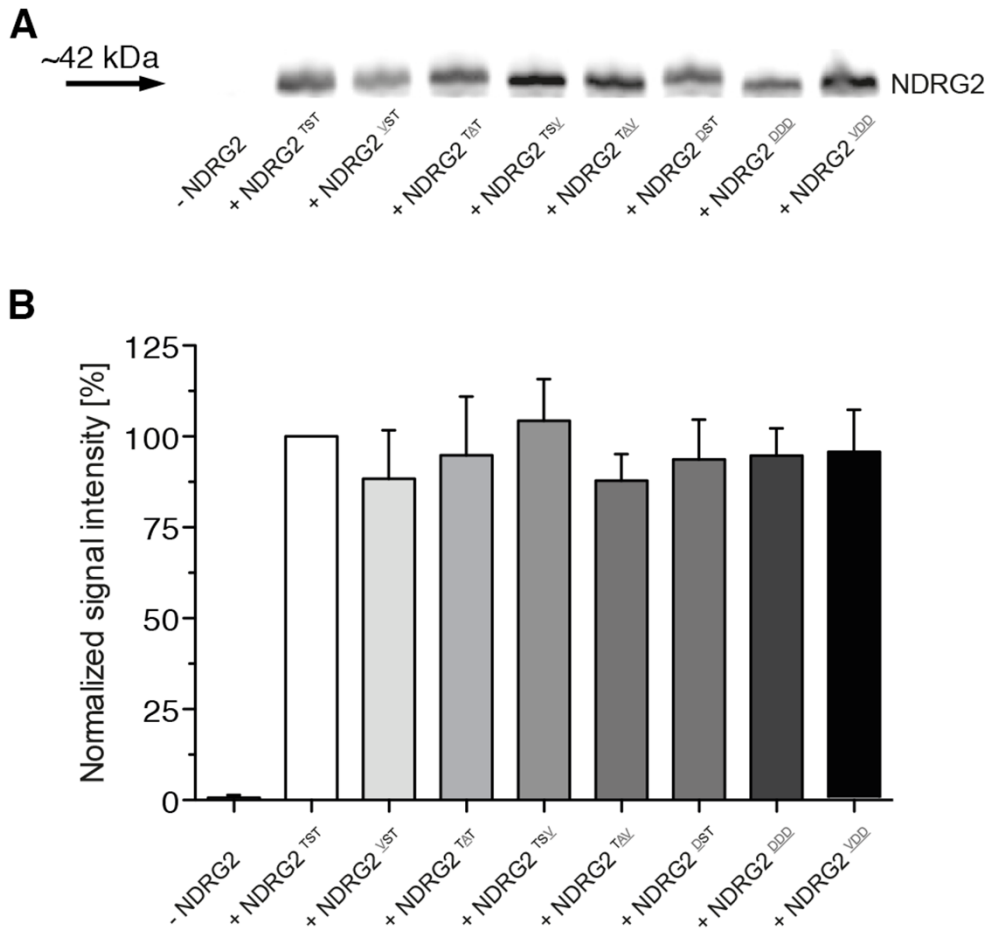

**Figure S2. Uniform expression of all NDRG2 mutants.** (A) Exemplary Western blot of cytosolic expressed NDRG2-variants after injection of the corresponding cRNAs and an expression time of 5-6 days. Oocytes were homogenized. Samples including controls from uninjected oocytes (-NDRG2) were separated on an SDS gel, blotted onto a nitrocellulose membrane and probed with an anti-NDRG2 antibody. The NDRG2 protein has an apparent molecular mass of ~42 kDa. (B) Quantification of Western blots performed to detect the cytosolic expressed NDRG2 mutants using ImageJ. The respective signal intensities were normalized to the value of the “+ NDRG2<sup>TST</sup>”. The introduction of point mutations into NDRG2-gene does not change the expression of the protein in *Xenopus laevis*-oocytes (n = 4).
